# Supplementary material for: Spatio-temporal patterns of the oceanic conditions and nearshore marine community in the Mid-Atlantic Bight (New Jersey, USA)
Source: PeerJ journal article supplement (doi:10.7717/peerj.7927), 2019-10-21

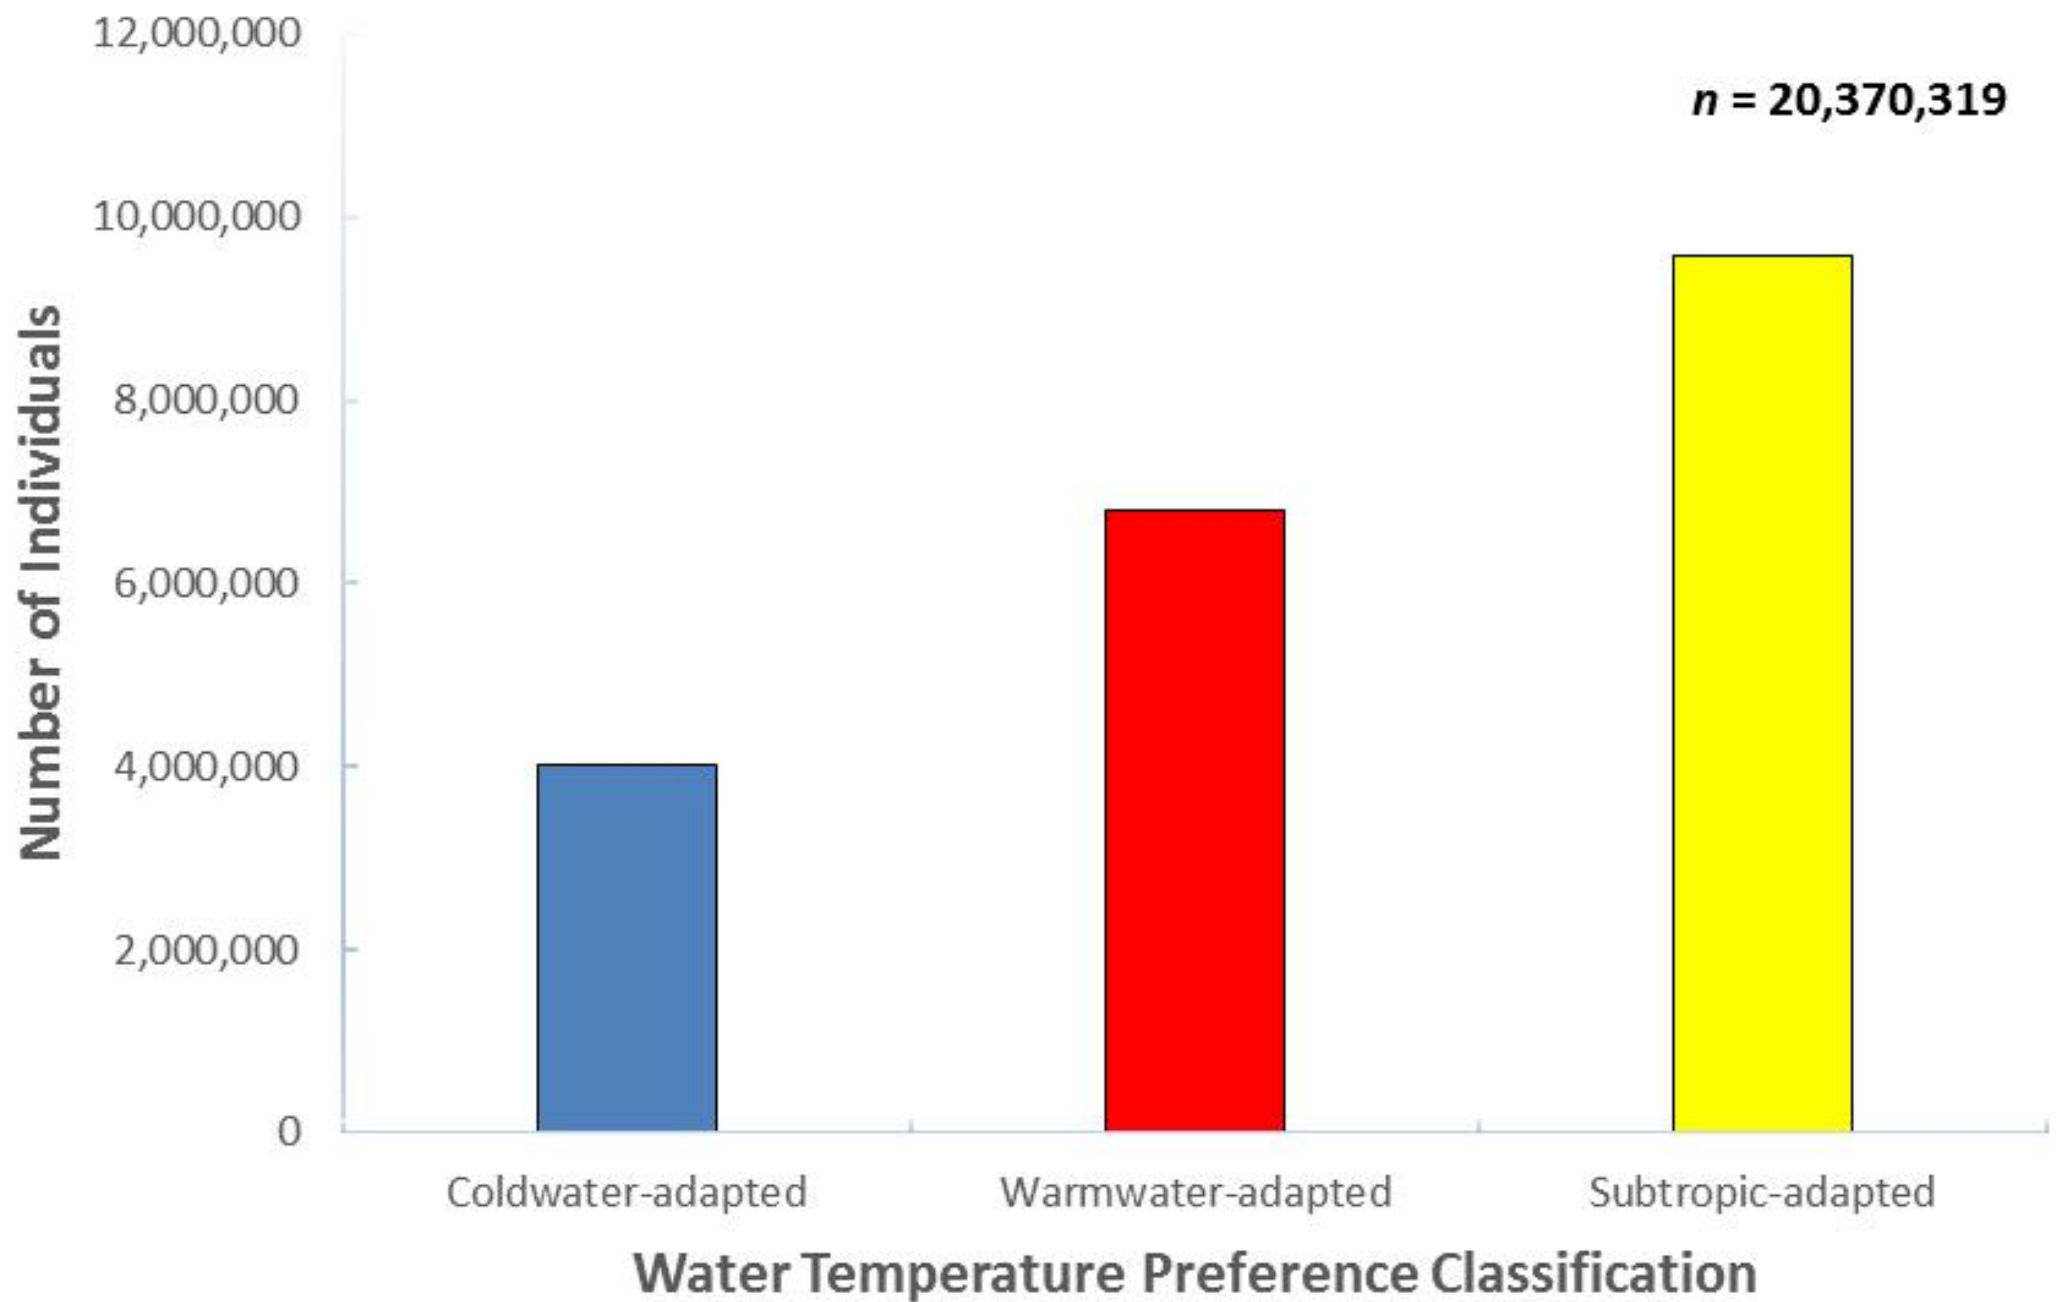

Supplement: Figure_S1.pdf [file Figure_S1.pdf]
